# Supplementary material for: Associations between dietary patterns and nephrolithiasis risk in a large Chinese cohort: is a balanced or plant-based diet better?
Source: Royal Society of Chemistry journal article supplement (doi:10.1039/d2fo03993a), 2023-01-01

## Supplementary Appendix

### **Associations between dietary patterns and nephrolithiasis risk in a large Chinese cohort: Is a balanced or plant-based diet better?**

**Running Title:** Dietary patterns and nephrolithiasis

Song Bai <sup>1,2,3\*</sup>, Yixiao Zhang <sup>1,2,3\*</sup>, Yashu Liu <sup>2,3</sup>, Qing Zhang <sup>4</sup>, Li Liu <sup>4</sup>, Shaomei Sun <sup>4</sup>, Xing Wang <sup>4</sup>, Ming Zhou <sup>4</sup>, Qiyu Jia <sup>4</sup>, Kun Song <sup>4</sup>, Tingjing Zhang <sup>5</sup>, Yang Ding <sup>6</sup>, Yuhong Zhao <sup>2,3</sup>, Kaijun Niu <sup>7,8†</sup>, and Yang Xia <sup>2,3†</sup>

\* These two authors contributed equally to this work.

† Address for correspondence to: Yang Xia or Kaijun Niu

#### **Names of department(s) and institution(s):**

1. Department of Urology Surgery, Shengjing Hospital of China Medical University, China Medical University, Shenyang, China.
2. Department of Clinical Epidemiology, Shengjing Hospital of China Medical University, China Medical University, Shenyang, China.
3. Key Laboratory of Precision Medical Research on Major Chronic Disease, Shenyang, China.
4. Health Management Centre, Tianjin Medical University General Hospital, Tianjin, China.
5. School of Public Health, Wannan Medical College, Wuhu, China.
6. Department of Infectious Diseases, Shengjing Hospital of China Medical University, China Medical University, Shenyang, China.

7. School of Public Health of Tianjin University of Traditional Chinese Medicine, Tianjin, China.

8. Nutritional Epidemiology Institute and School of Public Health, Tianjin Medical University, Tianjin, China.

### **Correspondence**

1. Yang Xia, M.D., Ph.D. Department of Clinical Epidemiology, Shengjing Hospital of China Medical University, No. 36, San Hao Street, Shenyang, Liaoning, 110004, China. Tel: +86-024-96615-13650. E-mail: [xytmu507@126.com](mailto:xytmu507@126.com) or [yxia@cmu.edu.cn](mailto:yxia@cmu.edu.cn)

2. Kaijun Niu, M.D., Ph.D. School of Public Health of Tianjin University of Traditional Chinese Medicine, 10 Poyanghu Road, West Area, Tuanbo New Town, Jinghai District, Tianjin 301617, China. Tel: +86-022-83336613. E-mail address: [nkj0809@gmail.com](mailto:nkj0809@gmail.com) or [niukajun@tmu.edu.cn](mailto:niukajun@tmu.edu.cn)

## Supplementary Method

Factor analysis was used to determine the major posteriori dietary patterns in the study population using the 25 food and beverage groups' intake data. The varimax rotation procedure was applied to improve dietary pattern interpretability. Three major dietary patterns with high factor loadings were revealed by the evaluations of the scree test and eigenvalues ( $>1$ ): fruit and sweet foods, balanced, and animal foods dietary patterns. Furthermore, according to previous studies [1, 2], six priori plant-based diets were determined: overall plant-based diet index (PDI), healthful plant-based diet index (hPDI), unhealthy plant-based diet index (uPDI), vegan diet, lacto-ovo-vegetarian diet, and fish-vegetarian diet. Briefly, to construct the PDI, hPDI, and uPDI, the 25 food groups were further categorized into 15 groups and classified as healthy plant foods, less-healthy plant foods, and animal foods, respectively (**Table S1**). Considering the dietary habits in Asia, we added pickled and salted vegetables to the classification of less-healthy plant foods according to literature [3]. Each of the 15 food groups was grouped into quintiles and assigned a score 1–5. For PDI, plant food groups were assigned positive scores, whereas animal food groups were assigned reverse scores. For hPDI, healthy plant foods were assigned positive scores, whereas less-healthy plant foods and animal food groups were assigned reverse scores. For uPDI, less-healthy plant foods were assigned positive scores, whereas healthy plant foods and animal food groups were assigned reverse scores. The theoretical scores of PDI, hPDI, and uPDI ranged from 15 to 75. The participants were classified into quartiles based on the distributions of the scores for further analyses. Vegan, lacto-ovo-vegetarian, and fish-

vegetarian diets were defined according to a previous study [2]. Participants were classified into two categories (adherence or not) for each diet. The participants were classified into two categories (adherence or non-adherence) for each diet. The vegan diet eliminated all types of animal food. The lacto-ovo-vegetarian diet eliminated animal foods, except dairy products, eggs, and egg products. The fish-vegetarian diet eliminated animal foods, except for fish and seafoods, egg, and egg products (**Table S2**).

### **References**

[1] Satija A, Bhupathiraju SN, Rimm EB, Spiegelman D, Chiuve SE, Borgi L, Willett WC, Manson JE, Sun Q, Hu FB. Plant-Based Dietary Patterns and Incidence of Type 2 Diabetes in US Men and Women: Results from Three Prospective Cohort Studies. *PLoS Med.* 2016 Jun 14;13(6):e1002039. doi: 10.1371/journal.pmed.1002039. PMID: 27299701; PMCID: PMC4907448.

[2] Marrone G, Guerriero C, Palazzetti D, Lido P, Marolla A, Di Daniele F, Noce A. Vegan Diet Health Benefits in Metabolic Syndrome. *Nutrients.* 2021 Mar 2;13(3):817. doi: 10.3390/nu13030817. PMID: 33801269; PMCID: PMC7999488.

[3] Kim H, Lee K, Rebholz CM, Kim J. Plant-based diets and incident metabolic syndrome: Results from a South Korean prospective cohort study. *PLoS Med.* 2020 Nov 18;17(11):e1003371. doi: 10.1371/journal.pmed.1003371. PMID: 33206633; PMCID: PMC7673569.

**Table S1. Food groups in PDI, hPDI, and uPDI.**

| Major food groups used for scoring |                                                                | The 24 food groups <sup>a</sup> | Scoring  |          |          |
|------------------------------------|----------------------------------------------------------------|---------------------------------|----------|----------|----------|
|                                    |                                                                |                                 | PDI      | hPDI     | uPDI     |
| <b>Healthy plant foods</b>         |                                                                |                                 |          |          |          |
| Whole grain                        | Whole grain                                                    |                                 | Positive | Positive | Reverse  |
| Fruit                              | Fruit                                                          |                                 | Positive | Positive | Reverse  |
| Vegetable                          | Vegetable, ginger, and garlic                                  |                                 | Positive | Positive | Reverse  |
| Legume and legume products         | Legume and legume products                                     |                                 | Positive | Positive | Reverse  |
| Nut                                | Nut                                                            |                                 | Positive | Positive | Reverse  |
| Tea and coffee                     | Tea and coffee                                                 |                                 | Positive | Positive | Reverse  |
| <b>Less-healthy plant foods</b>    |                                                                |                                 |          |          |          |
| Refined grain                      | Refined grain                                                  |                                 | Positive | Reverse  | Positive |
| Tuber                              | Tuber                                                          |                                 | Positive | Reverse  | Positive |
| Pickled and salted vegetables      | Pickled and salted vegetables                                  |                                 | Positive | Reverse  | Positive |
| Sweets and desserts                | Western-style cake, cookie, Chinese cake, ice cream, and candy |                                 | Positive | Reverse  | Positive |
| Sugar-containing beverages         | Sugar-sweetened beverages, fruits and vegetables juice         |                                 | Positive | Reverse  | Positive |
| <b>Animal foods</b>                |                                                                |                                 |          |          |          |
| Dairy and dairy products           | Dairy and dairy products                                       |                                 | Reverse  | Reverse  | Reverse  |
| Meat and meat products             | Meat, meat products, animal blood, animal organ                |                                 | Reverse  | Reverse  | Reverse  |
| Fish and seafoods                  | Fish and seafoods                                              |                                 | Reverse  | Reverse  | Reverse  |
| Egg and egg products               | Egg, preserved egg                                             |                                 | Reverse  | Reverse  | Reverse  |

PDI, overall plant-based diet index; hPDI, healthful plant-based diet index; uPDI, unhealthful plant-based diet index.

<sup>a</sup> Alcohol and alcoholic beverages was not included.

**Table S2. Associations between major dietary patterns determined by factor analysis and incident nephrolithiasis according to sex.**

| Dietary patterns                     | Quartiles    |                                |                          |                          | <i>P</i> trend <sup>a</sup> | <i>P</i> for interaction <sup>b</sup> |
|--------------------------------------|--------------|--------------------------------|--------------------------|--------------------------|-----------------------------|---------------------------------------|
|                                      | Q1           | Q2                             | Q3                       | Q4                       |                             |                                       |
| <b>Fruit and sweet foods pattern</b> |              |                                |                          |                          |                             | 0.19                                  |
| Men                                  |              |                                |                          |                          |                             |                                       |
| Range of scores                      | -6.19, -0.46 | -0.45, -0.18                   | -0.17, 0.21              | 0.22, 16.46              |                             |                                       |
| No. of participants                  | 3,588        | 3,587                          | 3,587                    | 3,588                    |                             |                                       |
| No. of incident nephrolithiasis      | 145          | 176                            | 155                      | 139                      |                             |                                       |
| Follow-up person-years               | 13,157       | 13,706                         | 13,508                   | 13,769                   |                             |                                       |
| Crude model                          | Reference    | 1.16 (0.93, 1.44) <sup>c</sup> | 1.04 (0.83, 1.30)        | 0.91 (0.72, 1.15)        | 0.26                        |                                       |
| Adjusted model 1 <sup>d</sup>        | Reference    | 1.12 (0.90, 1.39)              | 1.00 (0.80, 1.26)        | 0.88 (0.70, 1.11)        | 0.16                        |                                       |
| Adjusted model 2 <sup>e</sup>        | Reference    | 1.09 (0.86, 1.37)              | 1.01 (0.80, 1.27)        | 0.95 (0.75, 1.20)        | 0.56                        |                                       |
| Adjusted model 3 <sup>f</sup>        | Reference    | 1.07 (0.84, 1.36)              | 0.98 (0.76, 1.27)        | 0.88 (0.66, 1.17)        | 0.29                        |                                       |
| Women                                |              |                                |                          |                          |                             |                                       |
| Range of scores                      | -5.41, -0.37 | -0.36, -0.15                   | -0.14, 0.22              | 0.23, 12.60              |                             |                                       |
| No. of participants                  | 3,035        | 3,035                          | 3,035                    | 3,035                    |                             |                                       |
| No. of incident nephrolithiasis      | 41           | 55                             | 52                       | 43                       |                             |                                       |
| Follow-up person-years               | 11,774       | 11,610                         | 11,642                   | 11,929                   |                             |                                       |
| Crude model                          | Reference    | 1.36 (0.91, 2.04)              | 1.28 (0.85, 1.93)        | 1.04 (0.68, 1.56)        | 0.93                        |                                       |
| Adjusted model 1 <sup>d</sup>        | Reference    | 1.30 (0.87, 1.95)              | 1.22 (0.81, 1.84)        | 1.01 (0.66, 1.54)        | 0.84                        |                                       |
| Adjusted model 2 <sup>e</sup>        | Reference    | 1.34 (0.88, 2.05)              | 1.28 (0.85, 1.93)        | 1.05 (0.68, 1.63)        | 0.90                        |                                       |
| Adjusted model 3 <sup>f</sup>        | Reference    | 1.31 (0.84, 2.05)              | 1.23 (0.78, 1.94)        | 0.97 (0.57, 1.65)        | 0.72                        |                                       |
| <b>Balanced pattern</b>              |              |                                |                          |                          |                             | 0.41                                  |
| Men                                  |              |                                |                          |                          |                             |                                       |
| Range of scores                      | -3.31, -0.51 | -0.50, 0.05                    | 0.06, 0.65               | 0.66, 10.50              |                             |                                       |
| No. of participants                  | 3,588        | 3,587                          | 3,587                    | 3,588                    |                             |                                       |
| No. of incident nephrolithiasis      | 181          | 148                            | 153                      | 133                      |                             |                                       |
| Follow-up person-years               | 13,245       | 13,330                         | 13,765                   | 13,800                   |                             |                                       |
| Crude model                          | Reference    | 0.81 (0.65, 1.00)              | <b>0.80 (0.65, 0.99)</b> | <b>0.70 (0.56, 0.87)</b> | < 0.01                      |                                       |
| Adjusted model 1 <sup>d</sup>        | Reference    | 0.81 (0.65, 1.00)              | <b>0.78 (0.63, 0.96)</b> | <b>0.66 (0.53, 0.83)</b> | < 0.001                     |                                       |

|                                 |              |                          |                          |                          |      |
|---------------------------------|--------------|--------------------------|--------------------------|--------------------------|------|
| Adjusted model 2 <sup>e</sup>   | Reference    | <b>0.77 (0.61, 0.98)</b> | <b>0.76 (0.59, 0.99)</b> | <b>0.67 (0.50, 0.90)</b> | 0.01 |
| Adjusted model 3 <sup>f</sup>   | Reference    | <b>0.76 (0.59, 0.97)</b> | <b>0.74 (0.55, 0.98)</b> | <b>0.64 (0.46, 0.90)</b> | 0.01 |
| <b>Women</b>                    |              |                          |                          |                          |      |
| Range of scores                 | -3.83, -0.62 | -0.61, -0.14             | -0.13, 0.41              | 0.42, 6.60               |      |
| No. of participants             | 3,035        | 3,035                    | 3,035                    | 3,035                    |      |
| No. of incident nephrolithiasis | 48           | 51                       | 44                       | 48                       |      |
| Follow-up person-years          | 11,520       | 11,654                   | 11,724                   | 12,057                   |      |
| Crude model                     | Reference    | 1.05 (0.71, 1.56)        | 0.90 (0.60, 1.35)        | 0.95 (0.64, 1.42)        | 0.65 |
| Adjusted model 1 <sup>d</sup>   | Reference    | 1.08 (0.73, 1.60)        | 0.85 (0.56, 1.28)        | 0.81 (0.54, 1.22)        | 0.20 |
| Adjusted model 2 <sup>e</sup>   | Reference    | 1.07 (0.69, 1.65)        | 0.84 (0.52, 1.37)        | 0.83 (0.48, 1.44)        | 0.36 |
| Adjusted model 3 <sup>f</sup>   | Reference    | 1.05 (0.67, 1.64)        | 0.81 (0.48, 1.38)        | 0.78 (0.41, 1.48)        | 0.34 |
| <b>Animal foods pattern</b>     |              |                          |                          |                          |      |
| <b>Men</b>                      |              |                          |                          |                          |      |
| Range of scores                 | -4.66, -0.34 | -0.33, -0.09             | -0.08, 0.33              | 0.34, 15.17              |      |
| No. of participants             | 3,588        | 3,587                    | 3,587                    | 3,588                    |      |
| No. of incident nephrolithiasis | 150          | 168                      | 148                      | 149                      |      |
| Follow-up person-years          | 14,014       | 13,396                   | 13,282                   | 13,447                   |      |
| Crude model                     | Reference    | 1.19 (0.95, 1.48)        | 1.05 (0.84, 1.32)        | 1.05 (0.83, 1.31)        | 0.95 |
| Adjusted model 1 <sup>d</sup>   | Reference    | <b>1.29 (1.03, 1.61)</b> | 1.20 (0.95, 1.52)        | 1.23 (0.97, 1.56)        | 0.19 |
| Adjusted model 2 <sup>e</sup>   | Reference    | 1.19 (0.93, 1.51)        | 1.15 (0.91, 1.46)        | 1.24 (0.97, 1.57)        | 0.12 |
| Adjusted model 3 <sup>f</sup>   | Reference    | 1.11 (0.86, 1.43)        | 1.04 (0.80, 1.36)        | 1.07 (0.81, 1.43)        | 0.78 |
| <b>Women</b>                    |              |                          |                          |                          |      |
| Range of scores                 | -3.99, -0.44 | -0.43, -0.21             | -0.20, 0.11              | 0.12, 12.49              |      |
| No. of participants             | 3,035        | 3,035                    | 3,035                    | 3,035                    |      |
| No. of incident nephrolithiasis | 59           | 43                       | 49                       | 40                       |      |
| Follow-up person-years          | 11,947       | 11,581                   | 11,683                   | 11,742                   |      |
| Crude model                     | Reference    | 0.75 (0.51, 1.12)        | 0.85 (0.58, 1.24)        | 0.69 (0.46, 1.03)        | 0.10 |
| Adjusted model 1 <sup>d</sup>   | Reference    | 0.91 (0.61, 1.36)        | 1.15 (0.77, 1.70)        | 1.00 (0.66, 1.53)        | 0.78 |
| Adjusted model 2 <sup>e</sup>   | Reference    | 0.85 (0.55, 1.31)        | 1.09 (0.73, 1.64)        | 0.96 (0.63, 1.48)        | 0.93 |
| Adjusted model 3 <sup>f</sup>   | Reference    | 0.81 (0.51, 1.28)        | 1.02 (0.65, 1.62)        | 0.87 (0.52, 1.46)        | 0.76 |

0.26

<sup>a</sup> The linear trend was tested using the median value of each quartile as a continuous variable based on Cox proportional hazard model.

<sup>b</sup> The *P* for interaction was calculated using the cross-product terms of dietary pattern scores and sex in the fully adjusted model.

<sup>c</sup> Hazard ratio (95% confidence interval) (all such values).

<sup>d</sup> Adjusted for age and body mass index.

<sup>e</sup> Additionally adjusted for education levels, employment status, household income, smoking status, drinking status, physical activity, diabetes, hypertension, dyslipidemia, family history of diseases (cardiovascular diseases, hypertension, and diabetes), nutritional supplements intake, energy intake per day, water intake per day, and calcium intake per day based on model 1.

<sup>f</sup> Additionally adjusted for the other two major dietary patterns based on model 2.



**Table S3. Associations between PDI, hPDI, uPDI, and incident nephrolithiasis according to sex.**

| Dietary patterns                | Quartiles (n = 26,490) |                                |                          |                          | P trend <sup>a</sup> | P for interaction <sup>b</sup> |
|---------------------------------|------------------------|--------------------------------|--------------------------|--------------------------|----------------------|--------------------------------|
|                                 | Q1                     | Q2                             | Q3                       | Q4                       |                      |                                |
| <b>PDI</b>                      |                        |                                |                          |                          |                      | 0.28                           |
| Men                             |                        |                                |                          |                          |                      |                                |
| Range of scores                 | ≤40                    | 41, 45                         | 46, 50                   | ≥51                      |                      |                                |
| No. of participants             | 3726                   | 3164                           | 3723                     | 3737                     |                      |                                |
| No. of incident nephrolithiasis | 180                    | 141                            | 154                      | 140                      |                      |                                |
| Follow-up person-years          | 13548                  | 11973                          | 14304                    | 14316                    |                      |                                |
| Crude model                     | Reference              | 0.88 (0.70, 1.09) <sup>c</sup> | <b>0.80 (0.65, 0.99)</b> | <b>0.73 (0.58, 0.91)</b> | < 0.01               |                                |
| Adjusted model 1 <sup>d</sup>   | Reference              | 0.89 (0.71, 1.10)              | 0.81 (0.66, 1.01)        | <b>0.75 (0.60, 0.93)</b> | < 0.01               |                                |
| Adjusted model 2 <sup>e</sup>   | Reference              | 0.91 (0.71, 1.16)              | 0.86 (0.67, 1.11)        | 0.81 (0.61, 1.08)        | 0.15                 |                                |
| Women                           |                        |                                |                          |                          |                      |                                |
| Range of scores                 | ≤39                    | 40, 44                         | 48, 49                   | ≥50                      |                      |                                |
| No. of participants             | 2993                   | 2985                           | 3222                     | 2940                     |                      |                                |
| No. of incident nephrolithiasis | 39                     | 58                             | 54                       | 40                       |                      |                                |
| Follow-up person-years          | 11437                  | 11522                          | 12449                    | 11545                    |                      |                                |
| Crude model                     | Reference              | 1.48 (0.98, 2.21)              | 1.27 (0.84, 1.92)        | 1.01 (0.65, 1.58)        | 0.99                 |                                |
| Adjusted model 1 <sup>d</sup>   | Reference              | <b>1.53 (1.02, 2.29)</b>       | 1.32 (0.87, 1.99)        | 1.03 (0.66, 1.60)        | 0.89                 |                                |
| Adjusted model 2 <sup>e</sup>   | Reference              | <b>1.75 (1.11, 2.78)</b>       | 1.64 (0.99, 2.70)        | 1.37 (0.76, 2.44)        | 0.54                 |                                |
| <b>hPDI</b>                     |                        |                                |                          |                          |                      | 0.14                           |
| Men                             |                        |                                |                          |                          |                      |                                |
| Range of scores                 | ≤41                    | 42, 45                         | 46, 49                   | ≥50                      |                      |                                |
| No. of participants             | 3927                   | 3676                           | 3079                     | 3668                     |                      |                                |
| No. of incident nephrolithiasis | 156                    | 148                            | 134                      | 177                      |                      |                                |
| Follow-up person-years          | 14691                  | 13848                          | 11712                    | 13889                    |                      |                                |
| Crude model                     | Reference              | 1.00 (0.80, 1.26)              | 1.07 (0.85, 1.35)        | 1.20 (0.96, 1.48)        | 0.08                 |                                |
| Adjusted model 1 <sup>d</sup>   | Reference              | 0.94 (0.75, 1.18)              | 0.95 (0.75, 1.20)        | 1.02 (0.81, 1.28)        | 0.83                 |                                |
| Adjusted model 2 <sup>e</sup>   | Reference              | 0.90 (0.72, 1.14)              | 0.89 (0.70, 1.13)        | 0.89 (0.69, 1.15)        | 0.37                 |                                |
| Women                           |                        |                                |                          |                          |                      |                                |

|                                 |           |                   |                   |                          |         |      |
|---------------------------------|-----------|-------------------|-------------------|--------------------------|---------|------|
| Range of scores                 | ≤41       | 42, 45            | 46, 49            | ≥50                      |         |      |
| No. of participants             | 2906      | 3107              | 2918              | 3209                     |         |      |
| No. of incident nephrolithiasis | 35        | 43                | 49                | 64                       |         |      |
| Follow-up person-years          | 11338     | 12025             | 11189             | 12403                    |         |      |
| Crude model                     | Reference | 1.16 (0.74, 1.81) | 1.42 (0.92, 2.19) | <b>1.67 (1.11, 2.52)</b> | < 0.01  |      |
| Adjusted model 1 <sup>d</sup>   | Reference | 1.04 (0.66, 1.63) | 1.16 (0.75, 1.80) | 1.17 (0.76, 1.80)        | 0.41    |      |
| Adjusted model 2 <sup>e</sup>   | Reference | 1.04 (0.66, 1.63) | 1.18 (0.75, 1.84) | 1.18 (0.74, 1.87)        | 0.41    |      |
| <b>uPDI</b>                     |           |                   |                   |                          |         | 0.18 |
| <b>Men</b>                      |           |                   |                   |                          |         |      |
| Range of scores                 | ≤39       | 40, 44            | 45, 49            | ≥50                      |         |      |
| No. of participants             | 3397      | 4036              | 3624              | 3293                     |         |      |
| No. of incident nephrolithiasis | 133       | 163               | 150               | 169                      |         |      |
| Follow-up person-years          | 13174     | 15427             | 13531             | 12008                    |         |      |
| Crude model                     | Reference | 1.05 (0.84, 1.32) | 1.11 (0.88, 1.40) | <b>1.42 (1.13, 1.78)</b> | < 0.01  |      |
| Adjusted model 1 <sup>d</sup>   | Reference | 1.12 (0.89, 1.41) | 1.22 (0.97, 1.55) | <b>1.55 (1.23, 0.95)</b> | < 0.001 |      |
| Adjusted model 2 <sup>e</sup>   | Reference | 1.10 (0.87, 1.39) | 1.18 (0.91, 1.52) | <b>1.57 (1.17, 2.12)</b> | < 0.001 |      |
| <b>Women</b>                    |           |                   |                   |                          |         |      |
| Range of scores                 | ≤40       | 41, 44            | 45, 49            | ≥50                      |         |      |
| No. of participants             | 2979      | 3332              | 2623              | 3206                     |         |      |
| No. of incident nephrolithiasis | 45        | 59                | 32                | 55                       |         |      |
| Follow-up person-years          | 11870     | 12847             | 10158             | 12078                    |         |      |
| Crude model                     | Reference | 1.21 (0.82, 1.79) | 0.83 (0.53, 1.31) | 1.21 (0.81, 1.78)        | 0.70    |      |
| Adjusted model 1 <sup>d</sup>   | Reference | 1.30 (0.88, 1.92) | 0.95 (0.60, 1.49) | 1.37 (0.92, 2.03)        | 0.30    |      |
| Adjusted model 2 <sup>e</sup>   | Reference | 1.32 (0.88, 1.98) | 0.93 (0.57, 1.53) | 1.37 (0.82, 2.27)        | 0.49    |      |

PDI, overall plant-based diet index; hPDI, healthful plant-based diet index; uPDI, unhealthful plant-based diet index.

<sup>a</sup> The linear trend was tested by coding the quartiles as a continuous variable based on Cox proportional hazard model.

<sup>b</sup> The *P* for interaction was calculated using the cross-product terms of dietary pattern scores and sex in the fully adjusted model.

<sup>c</sup> Hazard ratio (95% confidence interval) (all such values).

<sup>d</sup> Adjusted for age and body mass index.

<sup>e</sup> Additionally adjusted for education levels, employment status, household income, smoking status, drinking status, physical activity, diabetes, hypertension, dyslipidemia, family history of diseases (cardiovascular diseases, hypertension, and diabetes), nutritional supplements intake, energy intake per day, water intake per day, calcium intake per day, and alcohol and alcoholic beverages intake based on model 1.

**Table S4. Associations between vegan diet, lacto-ovo-vegetarian diet, fish-vegetarian diet, and incident nephrolithiasis according to sex.**

| Dietary patterns                 | Men (n = 14,350) |                                | Women (n = 12,140) |                          | P for interaction <sup>a</sup> |
|----------------------------------|------------------|--------------------------------|--------------------|--------------------------|--------------------------------|
|                                  | No               | Yes                            | No                 | Yes                      |                                |
| <b>Vegan diet</b>                |                  |                                |                    |                          | 0.03                           |
| No. of participants              | 12,982           | 1,368                          | 11,220             | 920                      |                                |
| No. of incident nephrolithiasis  | 545              | 70                             | 183                | 8                        |                                |
| Follow-up person-years           | 49,071           | 5,069                          | 43,420             | 3,534                    |                                |
| Crude model                      | Reference        | 1.26 (0.98, 1.61) <sup>b</sup> | Reference          | 0.54 (0.27, 1.09)        |                                |
| Adjusted model 1 <sup>c</sup>    | Reference        | 1.22 (0.95, 1.57)              | Reference          | <b>0.49 (0.24, 0.99)</b> |                                |
| Adjusted model 2 <sup>d</sup>    | Reference        | 1.11 (0.77, 1.60)              | Reference          | <b>0.26 (0.11, 0.61)</b> |                                |
| Adjusted model 3 <sup>e</sup>    | Reference        | 1.08 (0.74, 1.59)              | Reference          | <b>0.25 (0.10, 0.59)</b> |                                |
| <b>Lacto-ovo-vegetarian diet</b> |                  |                                |                    |                          | 0.18                           |
| No. of participants              | 12,868           | 1,482                          | 11,100             | 1,040                    |                                |
| No. of incident nephrolithiasis  | 538              | 77                             | 177                | 14                       |                                |
| Follow-up person-years           | 48,685           | 5,454                          | 42,977             | 3,977                    |                                |
| Crude model                      | Reference        | <b>1.29 (1.02, 1.64)</b>       | Reference          | 0.86 (0.50, 1.48)        |                                |
| Adjusted model 1 <sup>c</sup>    | Reference        | 1.25 (0.99, 1.59)              | Reference          | 0.77 (0.44, 1.32)        |                                |
| Adjusted model 2 <sup>d</sup>    | Reference        | 1.18 (0.84, 1.67)              | Reference          | 0.55 (0.27, 1.11)        |                                |
| Adjusted model 3 <sup>e</sup>    | Reference        | 1.17 (0.82, 1.68)              | Reference          | 0.54 (0.26, 1.10)        |                                |
| <b>Fish-vegetarian diet</b>      |                  |                                |                    |                          | 0.57                           |
| No. of participants              | 12,776           | 1,574                          | 10,928             | 1,212                    |                                |
| No. of incident nephrolithiasis  | 533              | 82                             | 170                | 21                       |                                |
| Follow-up person-years           | 48,338           | 5,802                          | 42,289             | 4,666                    |                                |
| Crude model                      | Reference        | <b>1.30 (1.03, 1.64)</b>       | Reference          | 1.12 (0.71, 1.76)        |                                |
| Adjusted model 1 <sup>c</sup>    | Reference        | 1.25 (0.99, 1.58)              | Reference          | 0.97 (0.62, 1.53)        |                                |
| Adjusted model 2 <sup>d</sup>    | Reference        | 1.18 (0.85, 1.63)              | Reference          | 0.86 (0.48, 1.53)        |                                |
| Adjusted model 3 <sup>e</sup>    | Reference        | 1.16 (0.83, 1.63)              | Reference          | 0.86 (0.48, 1.55)        |                                |

<sup>a</sup> The P for interaction was calculated using the cross-product terms of dietary pattern and sex in the fully adjusted model.

<sup>b</sup> Hazard ratio (95% confidence interval) (all such values).

<sup>c</sup> Adjusted for age and body mass index.

<sup>d</sup> Additionally adjusted for education levels, employment status, household income, smoking status, drinking status, physical activity, diabetes, hypertension, dyslipidemia, family history of diseases (cardiovascular diseases, hypertension, and diabetes), nutritional supplements intake, energy intake per day, water intake per day, and calcium intake per day based on model 1.

<sup>e</sup> Additionally adjusted for intake of sweet foods (including western-style cake, cookie, Chinese cake, and ice cream and candy) and beverages (tea, coffee, sugar-containing beverages, fruits and vegetables juice, and alcohol and alcoholic beverages) based on model 2.

**Table S5. Associations between major dietary patterns determined by factor analysis and incident nephrolithiasis according to age.**

| Dietary patterns                     | Quartiles    |                                |                   |                          | <i>P</i> trend <sup>a</sup> | <i>P</i> for interaction <sup>b</sup> |
|--------------------------------------|--------------|--------------------------------|-------------------|--------------------------|-----------------------------|---------------------------------------|
|                                      | Q1           | Q2                             | Q3                | Q4                       |                             |                                       |
| <b>Fruit and sweet foods pattern</b> |              |                                |                   |                          |                             | 0.05                                  |
| < 40                                 |              |                                |                   |                          |                             |                                       |
| Range of scores                      | -5.90, -0.43 | -0.42, -0.17                   | -0.16, 0.23       | 0.24, 14.88              |                             |                                       |
| No. of participants                  | 3,438        | 3,438                          | 3,438             | 3,438                    |                             |                                       |
| No. of incident nephrolithiasis      | 81           | 86                             | 73                | 60                       |                             |                                       |
| Follow-up person-years               | 12,834       | 13,137                         | 13,003            | 13,282                   |                             |                                       |
| Crude model                          | Reference    | 1.03 (0.76, 1.40) <sup>c</sup> | 0.89 (0.65, 1.22) | <b>0.71 (0.51, 0.99)</b> | <b>0.03</b>                 |                                       |
| Adjusted model 1 <sup>d</sup>        | Reference    | 1.12 (0.83, 1.52)              | 0.97 (0.70, 1.33) | 0.74 (0.53, 1.04)        | 0.06                        |                                       |
| Adjusted model 2 <sup>e</sup>        | Reference    | 1.11 (0.81, 1.52)              | 0.97 (0.70, 1.33) | 0.76 (0.54, 1.07)        | 0.10                        |                                       |
| Adjusted model 3 <sup>f</sup>        | Reference    | 1.03 (0.74, 1.44)              | 0.87 (0.61, 1.24) | <b>0.64 (0.42, 0.97)</b> | <b>0.02</b>                 |                                       |
| ≥ 40                                 |              |                                |                   |                          |                             |                                       |
| Range of scores                      | -6.19, -0.40 | -0.39, -0.17                   | -0.16, 0.20       | 0.21, 16.46              |                             |                                       |
| No. of participants                  | 3,185        | 3,184                          | 3,184             | 3,185                    |                             |                                       |
| No. of incident nephrolithiasis      | 125          | 133                            | 126               | 122                      |                             |                                       |
| Follow-up person-years               | 11,978       | 12,326                         | 12,121            | 12,413                   |                             |                                       |
| Crude model                          | Reference    | 1.03 (0.81, 1.32)              | 0.99 (0.78, 1.28) | 0.94 (0.73, 1.21)        | 0.94                        |                                       |
| Adjusted model 1 <sup>d</sup>        | Reference    | 1.06 (0.83, 1.35)              | 1.03 (0.80, 1.32) | 0.97 (0.75, 1.24)        | 0.71                        |                                       |
| Adjusted model 2 <sup>e</sup>        | Reference    | 1.02 (0.79, 1.33)              | 1.03 (0.80, 1.32) | 1.03 (0.79, 1.33)        | 0.84                        |                                       |
| Adjusted model 3 <sup>f</sup>        | Reference    | 1.05 (0.80, 1.38)              | 1.08 (0.82, 1.42) | 1.07 (0.78, 1.47)        | 0.65                        |                                       |
| <b>Balanced pattern</b>              |              |                                |                   |                          |                             | 0.13                                  |
| < 40                                 |              |                                |                   |                          |                             |                                       |
| Range of scores                      | -3.25, -0.60 | -0.59, -0.12                   | -0.11, 0.45       | 0.46, 8.89               |                             |                                       |
| No. of participants                  | 3,438        | 3,438                          | 3,438             | 3,438                    |                             |                                       |
| No. of incident nephrolithiasis      | 82           | 73                             | 71                | 74                       |                             |                                       |
| Follow-up person-years               | 12,846       | 12,951                         | 13,191            | 13,268                   |                             |                                       |
| Crude model                          | Reference    | 0.88 (0.64, 1.21)              | 0.84 (0.61, 1.15) | 0.87 (0.63, 1.18)        | 0.34                        |                                       |
| Adjusted model 1 <sup>d</sup>        | Reference    | 0.88 (0.64, 1.20)              | 0.77 (0.56, 1.06) | 0.76 (0.55, 1.04)        | 0.06                        |                                       |

|      |                                 |              |                          |                   |                          |               |
|------|---------------------------------|--------------|--------------------------|-------------------|--------------------------|---------------|
|      | Adjusted model 2 <sup>e</sup>   | Reference    | 0.89 (0.64, 1.25)        | 0.84 (0.58, 1.20) | 0.87 (0.58, 1.30)        | 0.46          |
|      | Adjusted model 3 <sup>f</sup>   | Reference    | 0.81 (0.57, 1.15)        | 0.70 (0.47, 1.03) | 0.70 (0.42, 1.07)        | 0.08          |
| ≥ 40 | Range of scores                 | -3.83, -0.53 | -0.52, 0.04              | 0.05, 0.63        | 0.64, 10.50              |               |
|      | No. of participants             | 3,185        | 3,184                    | 3,184             | 3,185                    |               |
|      | No. of incident nephrolithiasis | 143          | 113                      | 134               | 116                      |               |
|      | Follow-up person-years          | 11,956       | 12,032                   | 12,329            | 12,520                   |               |
|      | Crude model                     | Reference    | 0.78 (0.61, 1.00)        | 0.90 (0.71, 1.14) | <b>0.77 (0.60, 0.98)</b> | 0.07          |
|      | Adjusted model 1 <sup>d</sup>   | Reference    | 0.78 (0.61, 1.00)        | 0.85 (0.67, 1.08) | <b>0.69 (0.54, 0.88)</b> | < <b>0.01</b> |
|      | Adjusted model 2 <sup>e</sup>   | Reference    | <b>0.74 (0.56, 0.97)</b> | 0.80 (0.60, 1.07) | <b>0.66 (0.47, 0.92)</b> | < <b>0.01</b> |
|      | Adjusted model 3 <sup>f</sup>   | Reference    | <b>0.72 (0.55, 0.98)</b> | 0.75 (0.56, 1.04) | <b>0.61 (0.44, 0.89)</b> | < <b>0.01</b> |
|      | <b>Animal foods pattern</b>     |              |                          |                   |                          | 0.06          |
| < 40 | Range of scores                 | -4.52, -0.30 | -0.29, -0.02             | -0.01, 0.35       | 0.36, 14.80              |               |
|      | No. of participants             | 3,639        | 3,237                    | 3,438             | 3,438                    |               |
|      | No. of incident nephrolithiasis | 75           | 63                       | 79                | 83                       |               |
|      | Follow-up person-years          | 13,981       | 12,283                   | 13,054            | 12,938                   |               |
|      | Crude model                     | Reference    | 0.96 (0.69, 1.34)        | 1.13 (0.82, 1.55) | 1.20 (0.88, 1.64)        | 0.16          |
|      | Adjusted model 1 <sup>d</sup>   | Reference    | 0.96 (0.69, 1.35)        | 1.08 (0.78, 1.48) | 1.00 (0.73, 1.38)        | 0.86          |
|      | Adjusted model 2 <sup>e</sup>   | Reference    | 0.94 (0.67, 1.32)        | 1.06 (0.77, 1.47) | 1.01 (0.73, 1.42)        | 0.78          |
|      | Adjusted model 3 <sup>f</sup>   | Reference    | 0.86 (0.61, 1.22)        | 0.91 (0.64, 1.29) | 0.81 (0.55, 1.18)        | 0.35          |
| ≥ 40 | Range of scores                 | -4.66, -0.55 | -0.54, -0.30             | -0.29, 0.05       | 0.06, 15.17              |               |
|      | No. of participants             | 3,185        | 3,185                    | 3,183             | 3,185                    |               |
|      | No. of incident nephrolithiasis | 120          | 110                      | 124               | 152                      |               |
|      | Follow-up person-years          | 12,487       | 12,324                   | 11,979            | 12,047                   |               |
|      | Crude model                     | Reference    | 0.93 (0.72, 1.21)        | 1.08 (0.84, 1.39) | <b>1.32 (1.04, 1.68)</b> | <b>0.01</b>   |
|      | Adjusted model 1 <sup>d</sup>   | Reference    | 0.93 (0.72, 1.21)        | 1.07 (0.83, 1.39) | 1.20 (0.94, 1.54)        | 0.09          |
|      | Adjusted model 2 <sup>e</sup>   | Reference    | 0.82 (0.61, 1.09)        | 1.00 (0.77, 1.30) | 1.20 (0.94, 1.54)        | 0.08          |

|                               |           |                   |                   |                   |      |
|-------------------------------|-----------|-------------------|-------------------|-------------------|------|
| Adjusted model 3 <sup>f</sup> | Reference | 0.80 (0.59, 1.08) | 0.98 (0.72, 1.31) | 1.15 (0.84, 1.59) | 0.22 |
|-------------------------------|-----------|-------------------|-------------------|-------------------|------|

<sup>a</sup> The linear trend was tested using the median value of each quartile as a continuous variable based on Cox proportional hazard model.

<sup>b</sup> The *P* for interaction was calculated using the cross-product terms of dietary pattern scores and sex in the fully adjusted model.

<sup>c</sup> Hazard ratio (95% confidence interval) (all such values).

<sup>d</sup> Adjusted for age, sex, and body mass index.

<sup>e</sup> Additionally adjusted for education levels, employment status, household income, smoking status, drinking status, physical activity, diabetes, hypertension, dyslipidemia, family history of diseases (cardiovascular diseases, hypertension, and diabetes), nutritional supplements intake, energy intake per day, water intake per day, and calcium intake per day based on model 1.

<sup>f</sup> Additionally adjusted for the other two major dietary patterns based on model 2.



**Table S6. Associations between PDI, hPDI, uPDI, and incident nephrolithiasis according to age.**

| Dietary patterns                | Quartiles (n = 26,490) |                                |                   |                   | P trend <sup>a</sup> | P for interaction <sup>b</sup> |
|---------------------------------|------------------------|--------------------------------|-------------------|-------------------|----------------------|--------------------------------|
|                                 | Q1                     | Q2                             | Q3                | Q4                |                      |                                |
| <b>PDI</b>                      |                        |                                |                   |                   |                      | 0.21                           |
| < 40                            |                        |                                |                   |                   |                      |                                |
| Range of scores                 | ≤40                    | 41, 45                         | 46, 50            | ≥51               |                      |                                |
| No. of participants             | 3,470                  | 3,256                          | 3,677             | 3,349             |                      |                                |
| No. of incident nephrolithiasis | 80                     | 72                             | 79                | 69                |                      |                                |
| Follow-up person-years          | 12,900                 | 12,338                         | 14,081            | 12,937            |                      |                                |
| Crude model                     | Reference              | 0.94 (0.68, 1.29) <sup>c</sup> | 0.90 (0.66, 1.22) | 0.85 (0.62, 1.17) | 0.31                 |                                |
| Adjusted model 1 <sup>d</sup>   | Reference              | 0.94 (0.68, 1.29)              | 0.83 (0.60, 1.13) | 0.73 (0.53, 1.01) | 0.04                 |                                |
| Adjusted model 2 <sup>e</sup>   | Reference              | 0.96 (0.68, 1.35)              | 0.87 (0.61, 1.24) | 0.76 (0.51, 1.15) | 0.16                 |                                |
| ≥ 40                            |                        |                                |                   |                   |                      |                                |
| Range of scores                 | ≤39                    | 40, 44                         | 48, 49            | ≥50               |                      |                                |
| No. of participants             | 3,341                  | 2,820                          | 3,197             | 3,380             |                      |                                |
| No. of incident nephrolithiasis | 138                    | 108                            | 133               | 127               |                      |                                |
| Follow-up person-years          | 12,435                 | 10,892                         | 12,400            | 13,110            |                      |                                |
| Crude model                     | Reference              | 0.89 (0.69, 1.14)              | 0.96 (0.76, 1.22) | 0.87 (0.68, 1.10) | 0.35                 |                                |
| Adjusted model 1 <sup>d</sup>   | Reference              | 0.91 (0.71, 1.17)              | 0.96 (0.75, 1.21) | 0.83 (0.65, 1.05) | 0.17                 |                                |
| Adjusted model 2 <sup>e</sup>   | Reference              | 0.94 (0.70, 1.24)              | 1.02 (0.76, 1.36) | 0.92 (0.67, 1.27) | 0.76                 |                                |
| <b>hPDI</b>                     |                        |                                |                   |                   |                      | 0.14                           |
| < 40                            |                        |                                |                   |                   |                      |                                |
| Range of scores                 | ≤40                    | 41, 43                         | 44, 47            | ≥48               |                      |                                |
| No. of participants             | 3,934                  | 2,998                          | 3,455             | 3,365             |                      |                                |
| No. of incident nephrolithiasis | 81                     | 62                             | 76                | 81                |                      |                                |
| Follow-up person-years          | 14,933                 | 11,597                         | 12,997            | 12,730            |                      |                                |
| Crude model                     | Reference              | 0.98 (0.71, 1.37)              | 1.08 (0.79, 1.47) | 1.17 (0.86, 1.60) | 0.26                 |                                |
| Adjusted model 1 <sup>d</sup>   | Reference              | 1.00 (0.72, 1.39)              | 1.16 (0.85, 1.59) | 1.25 (0.92, 1.70) | 0.11                 |                                |
| Adjusted model 2 <sup>e</sup>   | Reference              | 0.99 (0.71, 1.39)              | 1.13 (0.82, 1.56) | 1.19 (0.85, 1.67) | 0.26                 |                                |
| ≥ 40                            |                        |                                |                   |                   |                      |                                |

|                                 |           |                   |                   |                          |                  |      |
|---------------------------------|-----------|-------------------|-------------------|--------------------------|------------------|------|
| Range of scores                 | ≤43       | 44, 47            | 48, 50            | ≥51                      |                  |      |
| No. of participants             | 3,259     | 3,213             | 2,277             | 3,989                    |                  |      |
| No. of incident nephrolithiasis | 136       | 126               | 85                | 159                      |                  |      |
| Follow-up person-years          | 12,472    | 12,260            | 8,740             | 15,365                   |                  |      |
| Crude model                     | Reference | 0.94 (0.74, 1.20) | 0.89 (0.68, 1.17) | 0.95 (0.75, 1.19)        | 0.62             |      |
| Adjusted model 1 <sup>d</sup>   | Reference | 0.94 (0.74, 1.20) | 0.90 (0.68, 1.18) | 0.96 (0.76, 1.21)        | 0.72             |      |
| Adjusted model 2 <sup>e</sup>   | Reference | 0.91 (0.71, 1.17) | 0.86 (0.65, 1.13) | 0.86 (0.67, 1.12)        | 0.25             |      |
| <b>uPDI</b>                     |           |                   |                   |                          |                  | 0.06 |
| < 40                            |           |                   |                   |                          |                  |      |
| Range of scores                 |           |                   |                   |                          |                  |      |
| No. of participants             | 3,756     | 3,249             | 3,723             | 3,024                    |                  |      |
| No. of incident nephrolithiasis | 76        | 66                | 79                | 79                       |                  |      |
| Follow-up person-years          | 14,454    | 12,497            | 14,131            | 11,175                   |                  |      |
| Crude model                     | Reference | 1.00 (0.72, 1.40) | 1.07 (0.78, 1.47) | 1.36 (0.99, 1.86)        | 0.06             |      |
| Adjusted model 1 <sup>d</sup>   | Reference | 1.02 (0.73, 1.41) | 1.15 (0.84, 1.57) | <b>1.50 (1.09, 2.05)</b> | <b>&lt; 0.01</b> |      |
| Adjusted model 2 <sup>e</sup>   | Reference | 0.98 (0.70, 1.38) | 1.06 (0.75, 1.51) | 1.39 (0.92, 2.08)        | 0.14             |      |
| ≥ 40                            |           |                   |                   |                          |                  |      |
| Range of scores                 |           |                   |                   |                          |                  |      |
| No. of participants             | 3,385     | 2,807             | 3,629             | 2,917                    |                  |      |
| No. of incident nephrolithiasis | 126       | 108               | 142               | 130                      |                  |      |
| Follow-up person-years          | 13,365    | 10,856            | 13,760            | 10,856                   |                  |      |
| Crude model                     | Reference | 1.06 (0.82, 1.37) | 1.10 (0.87, 1.40) | <b>1.28 (1.01, 1.64)</b> | 0.05             |      |
| Adjusted model 1 <sup>d</sup>   | Reference | 1.11 (0.86, 1.44) | 1.19 (0.94, 1.52) | <b>1.40 (1.09, 1.79)</b> | <b>&lt; 0.01</b> |      |
| Adjusted model 2 <sup>e</sup>   | Reference | 1.10 (0.84, 1.43) | 1.18 (0.91, 1.53) | <b>1.46 (1.05, 2.02)</b> | <b>0.03</b>      |      |

PDI, overall plant-based diet index; hPDI, healthful plant-based diet index; uPDI, unhealthful plant-based diet index.

<sup>a</sup> The linear trend was tested by coding the quartiles as a continuous variable based on Cox proportional hazard model.

<sup>b</sup> The *P* for interaction was calculated using the cross-product terms of dietary pattern scores and sex in the fully adjusted model.

<sup>c</sup> Hazard ratio (95% confidence interval) (all such values).

<sup>d</sup> Adjusted for age and body mass index.

<sup>e</sup> Additionally adjusted for education levels, employment status, household income, smoking status, drinking status, physical activity, diabetes,

hypertension, dyslipidemia, family history of diseases (cardiovascular diseases, hypertension, and diabetes), nutritional supplements intake, energy intake per day, water intake per day, calcium intake per day, and alcohol and alcoholic beverages intake based on model 1.

**Table S7. Associations between vegan diet, lacto-ovo-vegetarian diet, fish-vegetarian diet, and incident nephrolithiasis according to age.**

| Dietary patterns                 | < 40 (n = 13,752) |                                | ≥ 40 (n = 12,738) |                   | <i>P</i> for interaction <sup>a</sup> |
|----------------------------------|-------------------|--------------------------------|-------------------|-------------------|---------------------------------------|
|                                  | No                | Yes                            | No                | Yes               |                                       |
| <b>Vegan diet</b>                |                   |                                |                   |                   | 0.94                                  |
| No. of participants              | 12849             | 903                            | 11353             | 1385              |                                       |
| No. of incident nephrolithiasis  | 279               | 21                             | 449               | 57                |                                       |
| Follow-up person-years           | 48865             | 3392                           | 43625             | 5212              |                                       |
| Crude model                      | Reference         | 1.10 (0.70, 1.71) <sup>b</sup> | Reference         | 1.07 (0.81, 1.41) |                                       |
| Adjusted model 1 <sup>c</sup>    | Reference         | 1.05 (0.67, 1.63)              | Reference         | 1.03 (0.78, 1.36) |                                       |
| Adjusted model 2 <sup>d</sup>    | Reference         | 0.85 (0.47, 1.52)              | Reference         | 0.84 (0.56, 1.25) |                                       |
| Adjusted model 3 <sup>e</sup>    | Reference         | 0.88 (0.48, 1.64)              | Reference         | 0.77 (0.51, 1.17) |                                       |
| <b>Lacto-ovo-vegetarian diet</b> |                   |                                |                   |                   | 0.98                                  |
| No. of participants              | 12785             | 967                            | 11183             | 1555              |                                       |
| No. of incident nephrolithiasis  | 276               | 24                             | 439               | 67                |                                       |
| Follow-up person-years           | 48642             | 3615                           | 43020             | 5817              |                                       |
| Crude model                      | Reference         | 1.19 (0.78, 1.80)              | Reference         | 1.13 (0.88, 1.47) |                                       |
| Adjusted model 1 <sup>c</sup>    | Reference         | 1.13 (0.74, 1.71)              | Reference         | 1.12 (0.86, 1.45) |                                       |
| Adjusted model 2 <sup>d</sup>    | Reference         | 0.98 (0.56, 1.70)              | Reference         | 1.01 (0.70, 1.46) |                                       |
| Adjusted model 3 <sup>e</sup>    | Reference         | 1.03 (0.58, 1.85)              | Reference         | 0.96 (0.65, 1.40) |                                       |
| <b>Fish-vegetarian diet</b>      |                   |                                |                   |                   | 0.94                                  |
| No. of participants              | 12736             | 1016                           | 10968             | 1770              |                                       |
| No. of incident nephrolithiasis  | 274               | 26                             | 429               | 77                |                                       |
| Follow-up person-years           | 48458             | 3799                           | 42168             | 6669              |                                       |
| Crude model                      | Reference         | 1.23 (0.82, 1.84)              | Reference         | 1.14 (0.89, 1.45) |                                       |
| Adjusted model 1 <sup>c</sup>    | Reference         | 1.19 (0.80, 1.78)              | Reference         | 1.15 (0.90, 1.47) |                                       |
| Adjusted model 2 <sup>d</sup>    | Reference         | 1.08 (0.63, 1.83)              | Reference         | 1.09 (0.78, 1.51) |                                       |
| Adjusted model 3 <sup>e</sup>    | Reference         | 1.15 (0.65, 2.01)              | Reference         | 1.04 (0.74, 1.47) |                                       |

<sup>a</sup> The *P* for interaction was calculated using the cross-product terms of dietary pattern and sex in the fully adjusted model.

<sup>b</sup> Hazard ratio (95% confidence interval) (all such values).

<sup>c</sup> Adjusted for age and body mass index.

<sup>d</sup> Additionally adjusted for education levels, employment status, household income, smoking status, drinking status, physical activity, diabetes, hypertension, dyslipidemia, family history of diseases (cardiovascular diseases, hypertension, and diabetes), nutritional supplements intake, energy intake per day, water intake per day, and calcium intake per day based on model 1.

<sup>e</sup> Additionally adjusted for intake of sweet foods (including western-style cake, cookie, Chinese cake, and ice cream and candy) and beverages (tea, coffee, sugar-containing beverages, fruits and vegetables juice, and alcohol and alcoholic beverages) based on model 2.

**Table S8. Associations between major food groups, nutrients, and incident nephrolithiasis**

| Dietary patterns                    | Quartiles (n = 26,490) |                                |                          |                          | P trend <sup>a</sup> |
|-------------------------------------|------------------------|--------------------------------|--------------------------|--------------------------|----------------------|
|                                     | Q1                     | Q2                             | Q3                       | Q4                       |                      |
| <b>Vegetable</b>                    |                        |                                |                          |                          |                      |
| Intake range (g/day)                | 0, 123                 | 124, 191                       | 192, 279                 | 280, 1790                |                      |
| No. of participants/cases           | 6624/213               | 6621/209                       | 6622/174                 | 6623/210                 |                      |
| Fully adjusted model <sup>c</sup>   | Reference              | 0.99 (0.80, 1.22) <sup>b</sup> | <b>0.78 (0.62, 0.99)</b> | 0.92 (0.71, 1.19)        | 0.31                 |
| <b>Fruit</b>                        |                        |                                |                          |                          |                      |
| Intake range                        | 0, 142                 | 143, 271                       | 272, 446                 | 447, 3440                |                      |
| No. of participants/cases           | 6623/240               | 6625/197                       | 6619/185                 | 6623/184                 |                      |
| Fully adjusted model <sup>c</sup>   | Reference              | 0.92 (0.75, 1.13)              | 0.91 (0.74, 1.14)        | 0.89 (0.70, 1.13)        | 0.38                 |
| <b>Animal foods</b>                 |                        |                                |                          |                          |                      |
| Intake range (g/day)                | 0, 89                  | 90, 136                        | 137, 196                 | 197, 1500                |                      |
| No. of participants/cases           | 6624/221               | 6621/193                       | 6620/175                 | 6625/217                 |                      |
| Fully adjusted model <sup>c</sup>   | Reference              | 0.90 (0.73, 1.11)              | <b>0.77 (0.62, 0.97)</b> | 0.92 (0.72, 1.18)        | 0.49                 |
| <b>Sugared beverages and snacks</b> |                        |                                |                          |                          |                      |
| Intake range (g/day)                | 0, 6                   | 7, 31                          | 32, 78                   | 79, 1664                 |                      |
| No. of participants/cases           | 6777/247               | 6474/200                       | 6591/190                 | 6648/169                 |                      |
| Fully adjusted model <sup>c</sup>   | Reference              | 1.04 (0.85, 1.27)              | 1.03 (0.84, 1.27)        | 0.93 (0.73, 1.17)        | 0.77                 |
| <b>Carbohydrate</b>                 |                        |                                |                          |                          |                      |
| Intake range (g/day)                | 0, 247                 | 248, 341                       | 342, 452                 | 453, 3659                |                      |
| No. of participants/cases           | 6623/232               | 6622/185                       | 6622/210                 | 6623/179                 |                      |
| Fully adjusted model <sup>c</sup>   | Reference              | <b>0.77 (0.61, 0.98)</b>       | 0.88 (0.67, 1.15)        | <b>0.72 (0.52, 0.99)</b> | 0.12                 |
| <b>Protein</b>                      |                        |                                |                          |                          |                      |
| Intake range (g/day)                | 0, 60                  | 61, 83                         | 84, 110                  | 111, 854                 |                      |
| No. of participants/cases           | 6623/227               | 6622/179                       | 6622/205                 | 6623/195                 |                      |
| Fully adjusted model <sup>c</sup>   | Reference              | 0.72 (0.57, 0.91)              | 0.78 (0.59, 1.04)        | 0.71 (0.50, 1.01)        | 0.17                 |
| <b>Fat</b>                          |                        |                                |                          |                          |                      |
| Intake range (g/day)                | 0, 31                  | 32, 44                         | 45, 60                   | 61, 605                  |                      |
| No. of participants/cases           | 6623/223               | 6622/183                       | 6622/191                 | 6623/209                 |                      |

|                                   |           |                   |                   |                   |      |
|-----------------------------------|-----------|-------------------|-------------------|-------------------|------|
| Fully adjusted model <sup>c</sup> | Reference | 0.83 (0.66, 1.05) | 0.88 (0.67, 1.15) | 0.96 (0.69, 1.32) | 0.84 |
|-----------------------------------|-----------|-------------------|-------------------|-------------------|------|

<sup>a</sup> The linear trend was tested using the median value of each quartile as a continuous variable based on Cox proportional hazard model.

<sup>b</sup> Hazard ratio (95% confidence interval) (all such values).

<sup>c</sup> Adjusted for age, sex, body mass index, education levels, employment status, household income, smoking status, drinking status, physical activity, diabetes, hypertension, dyslipidemia, family history of diseases (cardiovascular diseases, hypertension, and diabetes), energy intake per day, water intake per day, and calcium intake per day.

**Table S9. Associations between dietary patterns and incident nephrolithiasis (2,131 participants with history of nutritional supplements intake were excluded).**

| Dietary patterns                     | Quartiles (n = 24,359) |                                |                          |                          | <i>P</i> trend <sup>a</sup> |
|--------------------------------------|------------------------|--------------------------------|--------------------------|--------------------------|-----------------------------|
|                                      | Q1                     | Q2                             | Q3                       | Q4                       |                             |
| <b>Fruit and sweet foods pattern</b> |                        |                                |                          |                          |                             |
| No. of participants/cases            | 6,090/193              | 6,090/205                      | 6,089/196                | 6,090/171                |                             |
| Fully adjusted model <sup>c</sup>    | Reference              | 1.04 (0.84, 1.29) <sup>b</sup> | 1.04 (0.83, 1.30)        | 0.89 (0.69, 1.14)        | 0.34                        |
| <b>Balanced pattern</b>              |                        |                                |                          |                          |                             |
| No. of participants/cases            | 6,090/210              | 6,090/184                      | 6,089/180                | 6,090/191                |                             |
| Fully adjusted model <sup>c</sup>    | Reference              | 0.84 (0.67, 1.05)              | <b>0.74 (0.57, 0.96)</b> | <b>0.73 (0.54, 0.99)</b> | <b>0.03</b>                 |
| <b>Animal foods pattern</b>          |                        |                                |                          |                          |                             |
| No. of participants/cases            | 6,090/185              | 6,090/185                      | 6,089/198                | 6,090/197                |                             |
| Fully adjusted model <sup>c</sup>    | Reference              | 0.97 (0.76, 1.22)              | 1.14 (0.90, 1.44)        | 1.06 (0.82, 1.37)        | 0.48                        |
| <b>PDI</b>                           |                        |                                |                          |                          |                             |
| No. of participants/cases            | 5,959/189              | 5,781/187                      | 6,179/200                | 6,440/189                |                             |
| Fully adjusted model <sup>d</sup>    | Reference              | 1.10 (0.88, 1.39)              | 1.11 (0.87, 1.41)        | 1.02 (0.79, 1.33)        | 0.99                        |
| <b>hPDI</b>                          |                        |                                |                          |                          |                             |
| No. of participants/cases            | 6,251/180              | 6,201/181                      | 5,477/174                | 6,430/230                |                             |
| Fully adjusted model <sup>d</sup>    | Reference              | 0.94 (0.76, 1.16)              | 0.95 (0.76, 1.18)        | 0.95 (0.76, 1.19)        | 0.71                        |
| <b>uPDI</b>                          |                        |                                |                          |                          |                             |
| No. of participants/cases            | 6,403/200              | 5,409/160                      | 6,392/188                | 6,155/217                |                             |
| Fully adjusted model <sup>d</sup>    | Reference              | 1.04 (0.84, 1.29)              | 1.11 (0.89, 1.37)        | <b>1.43 (1.11, 1.84)</b> | <b>0.01</b>                 |
| <b>Vegan diet</b>                    | No                     | Yes                            |                          |                          |                             |
| No. of participants/cases            | 22,134/688             | 2,225/77                       |                          |                          |                             |
| Fully adjusted model <sup>e</sup>    | Reference              | 0.82 (0.58, 1.17)              |                          |                          |                             |
| <b>Lacto-ovo-vegetarian diet</b>     | No                     | Yes                            |                          |                          |                             |
| No. of participants/cases            | 21,918/677             | 2,441/88                       |                          |                          |                             |
| Fully adjusted model <sup>e</sup>    | Reference              | 0.96 (0.69, 1.33)              |                          |                          |                             |
| <b>Fish-vegetarian diet</b>          | No                     | Yes                            |                          |                          |                             |
| No. of participants/cases            | 21,676/665             | 2,683/100                      |                          |                          |                             |



|                                   |           |                   |
|-----------------------------------|-----------|-------------------|
| Fully adjusted model <sup>e</sup> | Reference | 1.07 (0.79, 1.44) |
|-----------------------------------|-----------|-------------------|

PDI, overall plant-based diet index; hPDI, healthful plant-based diet index; uPDI, unhealthful plant-based diet index.

<sup>a</sup> The linear trend was tested using the median value of each quartile as a continuous variable based on Cox proportional hazard model.

<sup>b</sup> Hazard ratio (95% confidence interval) (all such values).

<sup>c</sup> Adjusted for age, sex, body mass index, education levels, employment status, household income, smoking status, drinking status, physical activity, diabetes, hypertension, dyslipidemia, family history of diseases (cardiovascular diseases, hypertension, and diabetes), energy intake per day, water intake per day, and calcium intake per day, and the other two major dietary patterns.

<sup>d</sup> Adjusted for age, sex, body mass index, education levels, employment status, household income, smoking status, drinking status, physical activity, diabetes, hypertension, dyslipidemia, family history of diseases (cardiovascular diseases, hypertension, and diabetes), energy intake per day, water intake per day, calcium intake per day, and alcohol and alcoholic beverages intake.

<sup>e</sup> Adjusted for age, sex, body mass index, education levels, employment status, household income, smoking status, drinking status, physical activity, diabetes, hypertension, dyslipidemia, family history of diseases (cardiovascular diseases, hypertension, and diabetes), energy intake per day, water intake per day, and calcium intake per day, sweet foods (including western-style cake, cookie, Chinese cake, and ice cream and candy) intake per day, and beverages (tea, coffee, sugar-containing beverages, fruits and vegetables juice, and alcohol and alcoholic beverages) intake per day.

**Supplementary Figure 1**

**Associations between major dietary patterns determined by factor analysis and incident nephrolithiasis**

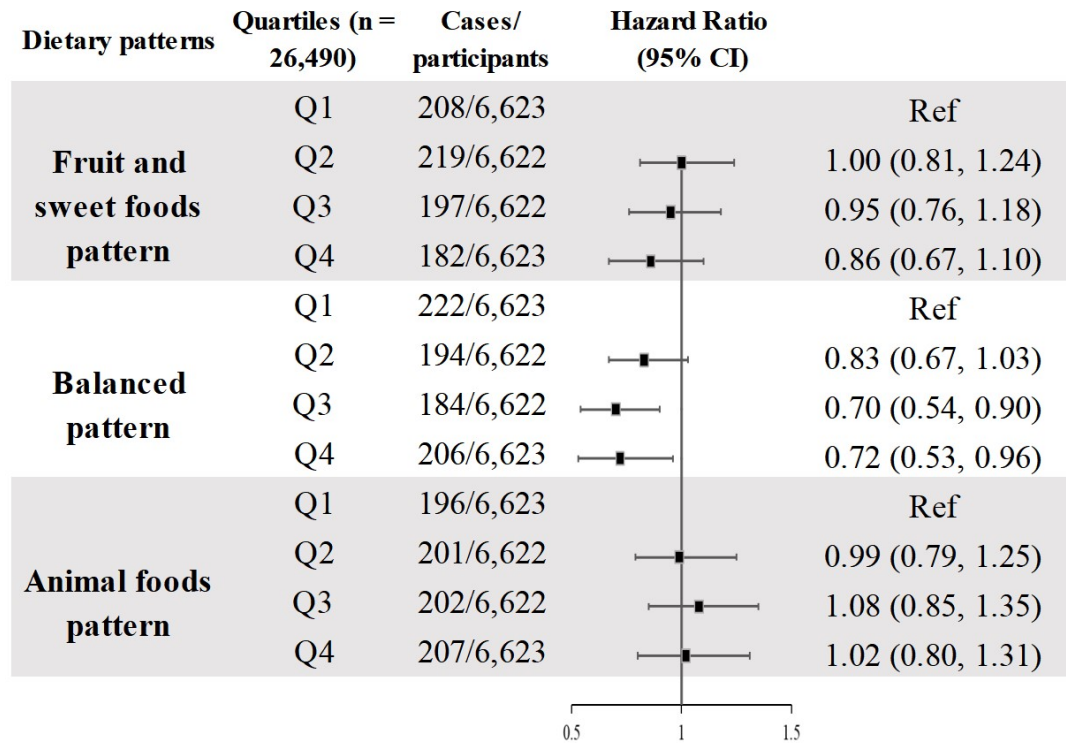

**Supplementary Figure 2**

**Associations between PDI, hPDI, uPDI, and incident nephrolithiasis**

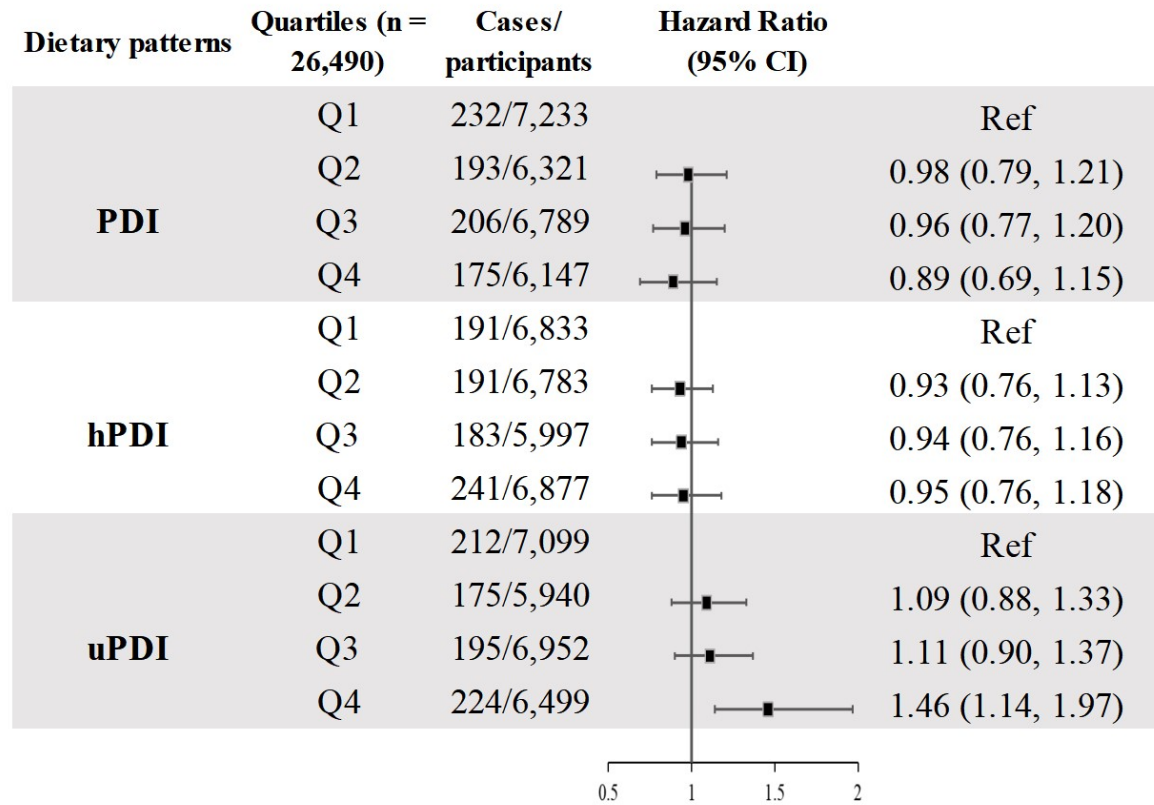

**Supplementary Figure 3**

**Associations between vegan diet, lacto-ovo-vegetarian diet, fish-vegetarian diet, and incident nephrolithiasis**

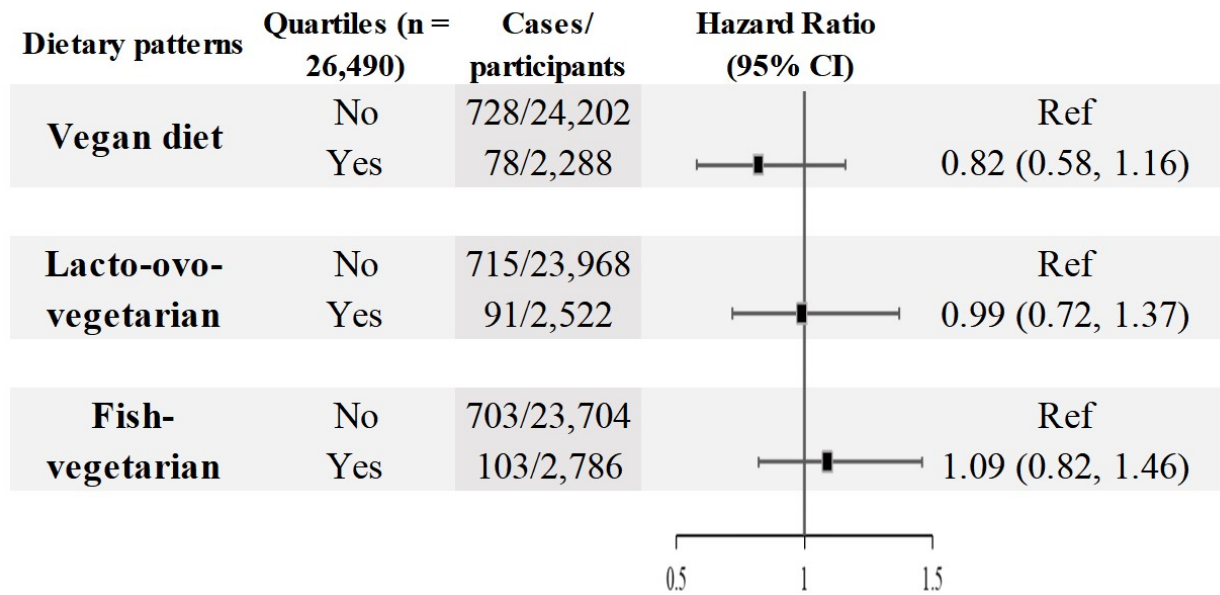

Supplement: d2fo03993a1.pdf [file d2fo03993a1.pdf]
