# Supplementary figures and images for: Associations between dietary patterns and nephrolithiasis risk in a large Chinese cohort: is a balanced or plant-based diet better?
Source: Royal Society of Chemistry journal article supplement (doi:10.1039/d2fo03993a), 2023-01-01

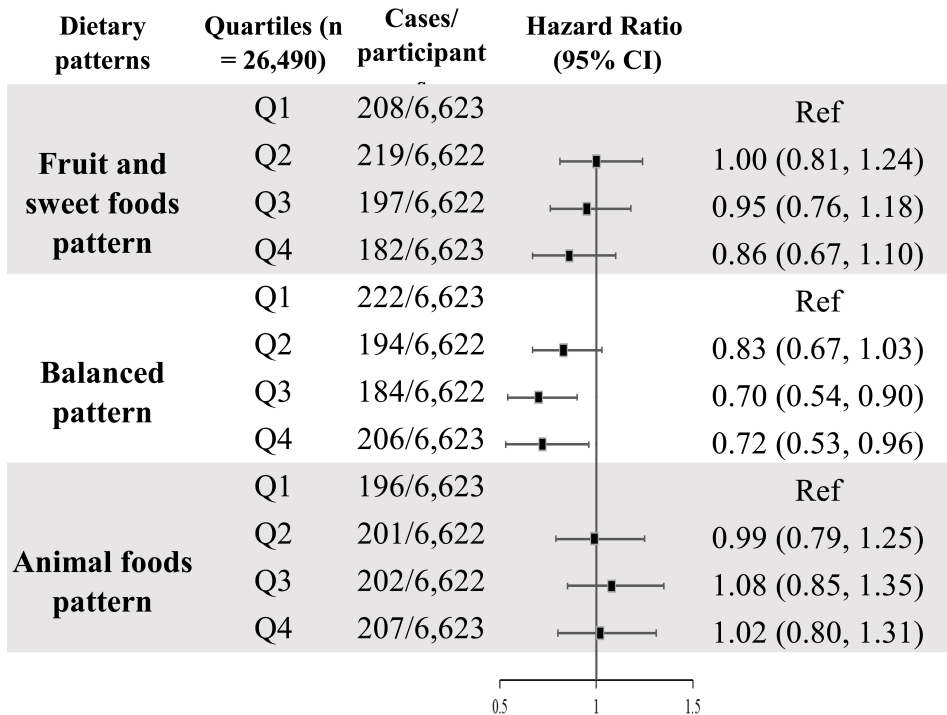

Supplement: d2fo03993a2.pdf [file d2fo03993a2.pdf]

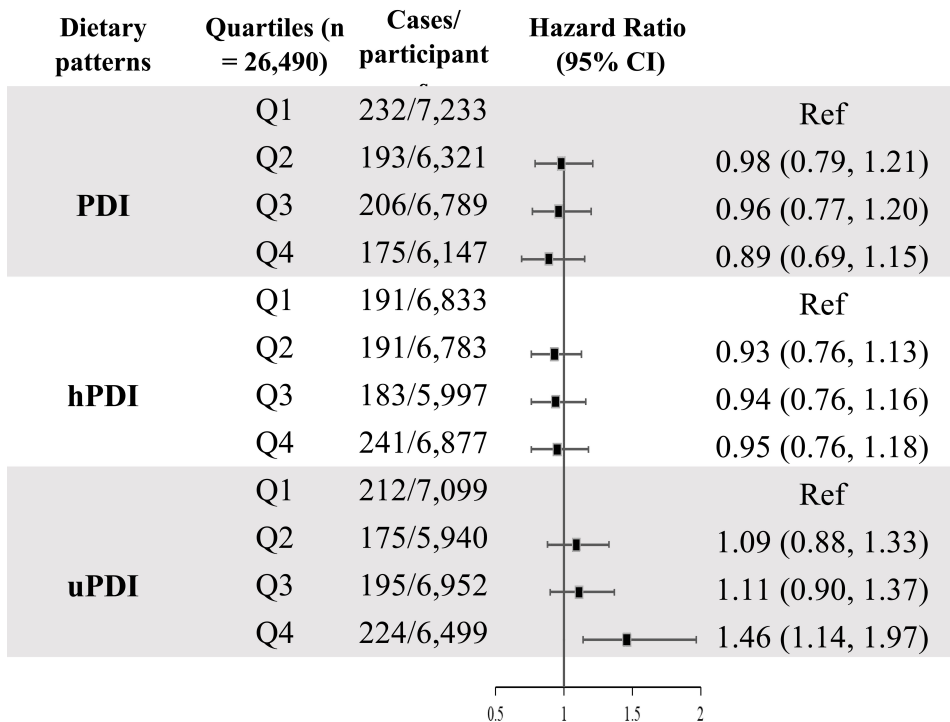

Supplement: d2fo03993a3.pdf [file d2fo03993a3.pdf]

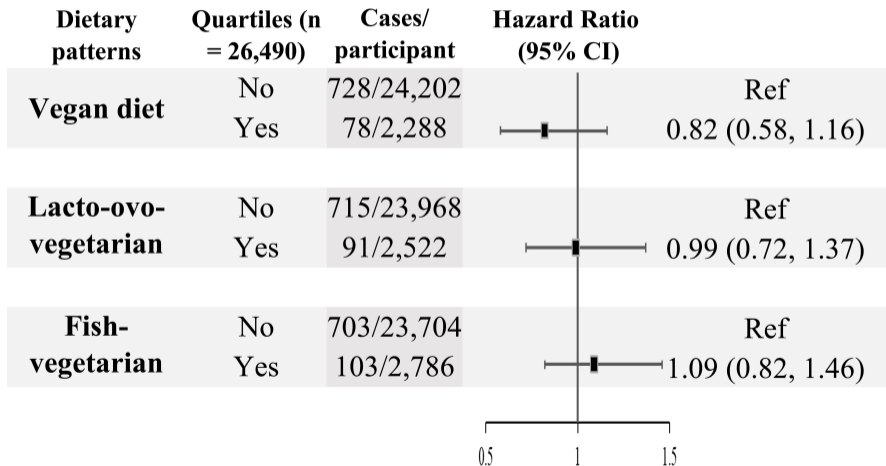

Supplement: d2fo03993a4.pdf [file d2fo03993a4.pdf]
